# Supplementary material for: C9orf72 Toxic Species Affect ArfGAP-1 Function
Source: MDPI journal article supplement (doi:10.3390/cells12152007), 2023-08-05
Supplement: s1 [file s1]

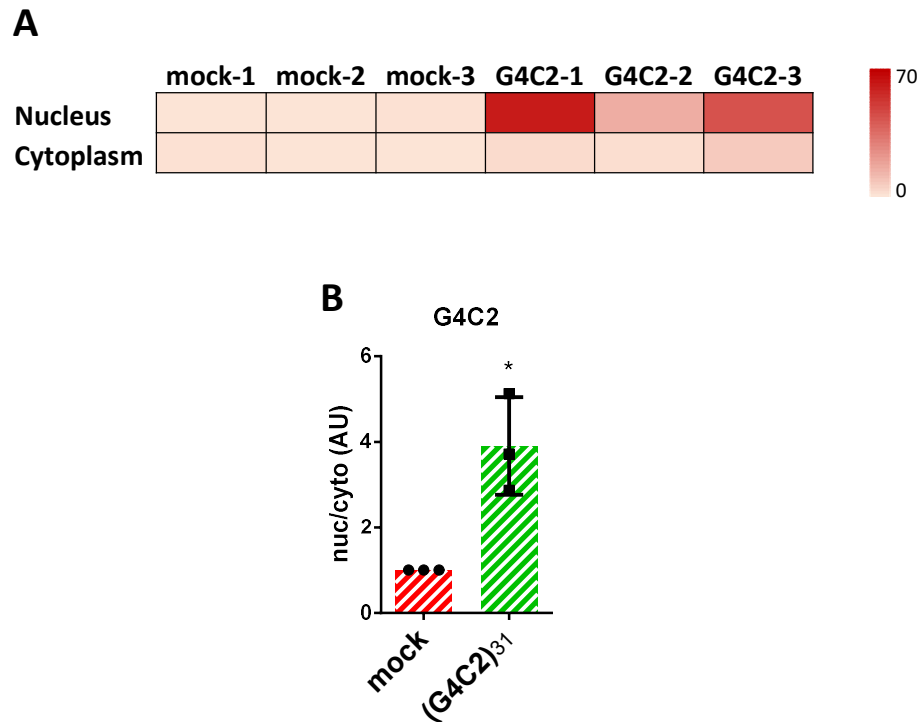

**Supplementary Figure S1.** G4C2 repeats accumulate in the nuclei of transfected HeLa cells. **(A)** Fastq files from the RNAseq analysis of nuclear and cytoplasmic fractions from mock- or G4C2<sub>31</sub>- transfected HeLa cells were screened for the presence of G4C2 sequences. Heatmap of the reads found was produced with the number of reads proportional to the indicated color code. **(B)** HeLa cells were transfected with a control plasmid (mock) or a plasmid coding for (G4C2)<sub>31</sub>. Total RNAs were extracted from purified nuclear and cytosolic fractions and analyzed by RT-qPCR for the expression of exogenous RNAs using primers annealing plasmid sequence upstream the cloning site of G4C2 repeat. *GAPDH* and *malat1* were used as housekeeping reference RNAs for the cytosolic and nuclear fraction, respectively. The ratio between the expression of a given RNA in each of the two fractions from G4C2-expressing cells was calculated and plotted considering the same ratio in control cells as 1. SD was calculated from n=3 independent experiments. \*p<0.05.
