# Supplementary material for: C9orf72 Toxic Species Affect ArfGAP-1 Function
Source: MDPI journal article supplement (doi:10.3390/cells12152007), 2023-08-05
Supplement: s1 [file s1]

**Supplementary Table S1.** List of oligonucleotides used in qPCR experiments.

| Gene name        | Forward sequence        | Reverse sequence        |
|------------------|-------------------------|-------------------------|
| <i>MALAT1</i>    | CCTGCAAATTGTAAACAGAAGGG | AGCTTCCGCTAAGATGCTAGCTT |
| <i>GAPDH</i>     | TCTTTTGCGTCGCCAGCCGAG   | TGACCAGGCGCCCAATACGAC   |
| <i>TPM4</i>      | CATCCAGCTCGTTGAGGAGG    | TGGCCCGGTTTTCTATCACC    |
| <i>ARFGAP-1</i>  | CTCGGAGGGCCACAGTTATC    | GCACTTCCAAAGGTCTCCCA    |
| <i>PDCD6</i>     | CACGGGTGTGTGGAAGTACA    | GTGGAAGTGGTCAGAGAGCC    |
| <i>MRPL4</i>     | ACCTGCACCCCGATGTTTTTC   | TGGTCTTGGCATAGCTAATTCTC |
| <i>NUDT16</i>    | GGACAGCAGAGGAGCAGTG     | GCATCTGCATCAGTATGGCG    |
| <i>VPS54</i>     | CGGGACCCGCGAGTTGAGT     | GGGTTCTTGGGACACACAT     |
| <i>dARFGAP-1</i> | AGGTTATGGCGGAAACGGAG    | TGGAAAGCGTCGAGTCGAAA    |
| pcDNA5           | CGCAAATGGGCGGTAGGCGTG   | CACTAAACGAGCTCGTCGACG   |
