# Supplementary figures and images for: C9orf72 Toxic Species Affect ArfGAP-1 Function
Source: MDPI journal article supplement (doi:10.3390/cells12152007), 2023-08-05

# Experiment 1

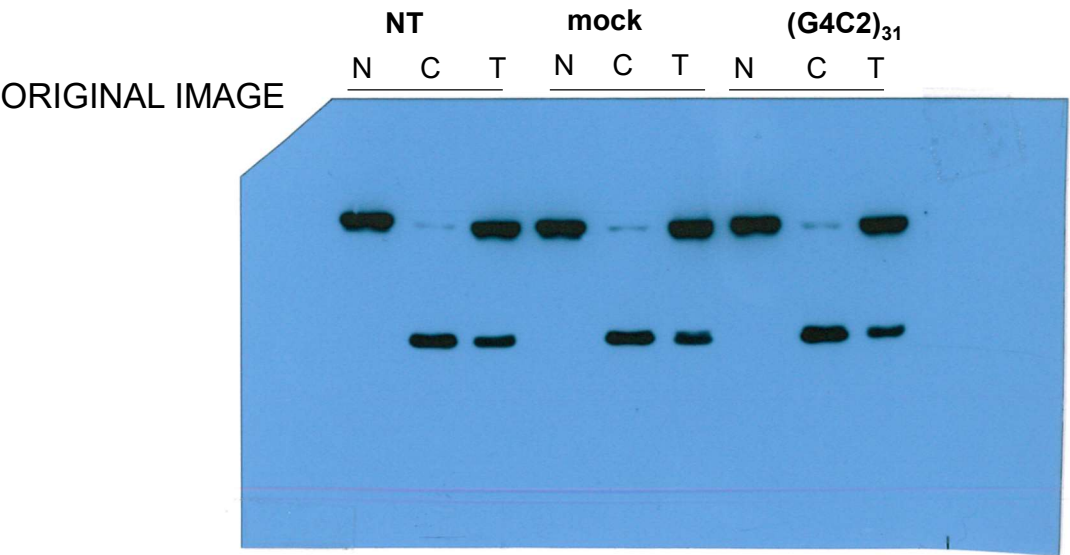

hnRNP H

GAPDH

FINAL IMAGE

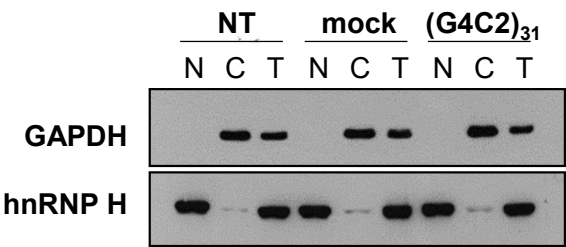

# Experiment 2

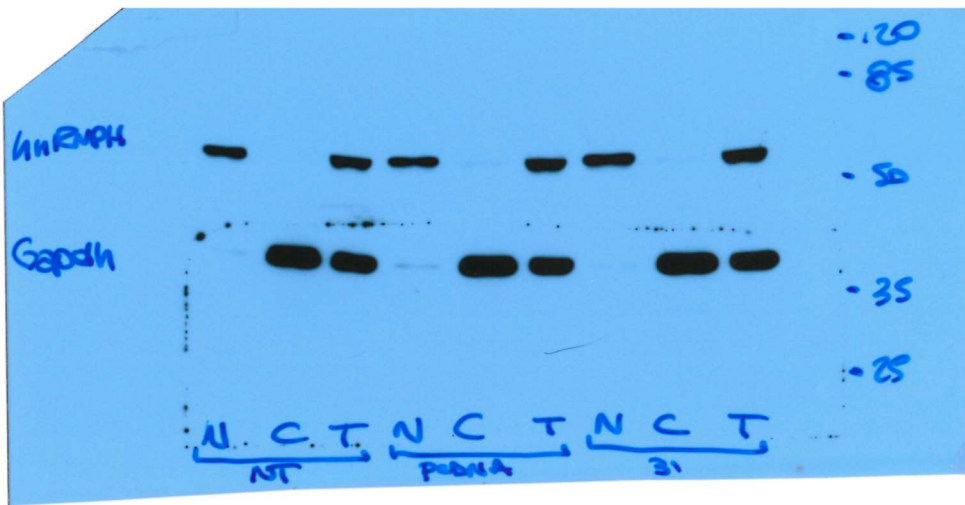

# Experiment 3

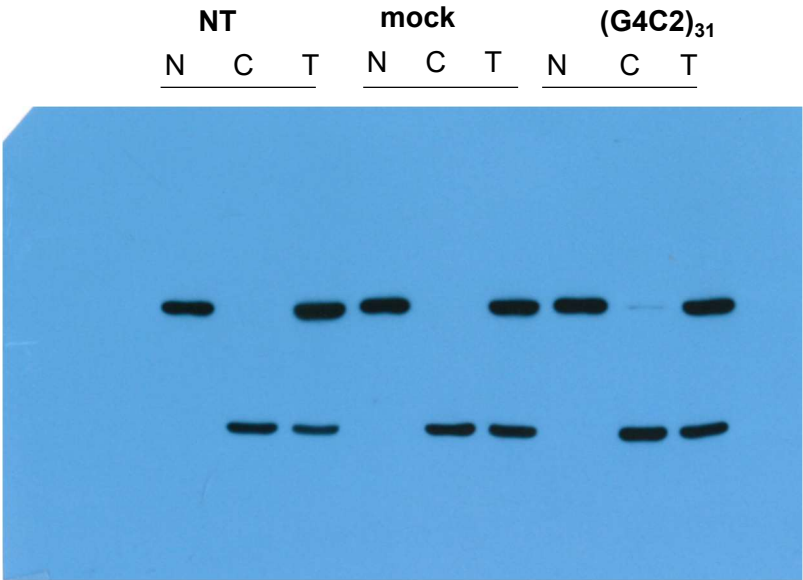

hnRNP H

GAPDH

Supplement: s1 [file s1]
